# Supplementary material for: Fast RAFT aqueous polymerization in a continuous tubular reactor: consecutive synthesis of a double hydrophilic block copolymer
Source: Royal Society of Chemistry journal article supplement (doi:10.1039/c5py00847f), 2015-01-01
Supplement: c5py00847f1.pdf [file c5py00847f1.pdf]

## Supporting Information

### Fast RAFT Aqueous Polymerization in a Continuous Tubular Reactor: Consecutive Synthesis of Double Hydrophilic Block Copolymer

Zhen Li, Weijie Chen, Lifen Zhang,\* Zhenping Cheng\* and Xiulin Zhu

5 Suzhou Key Laboratory of Macromolecular Design and Precision Synthesis, Jiangsu Key Laboratory of Advanced Functional Polymer Design and Application, Department of Polymer Science and Engineering, College of Chemistry, Chemical Engineering and Materials Science, Soochow University, Suzhou 215123, China

\*Corresponding authors. E-mail: chengzhenping@suda.edu.cn (Z. P. Cheng) or 10 zhanglifan@suda.edu.cn (L. F. Zhang), Fax: 86-512-65882787

**Table S1** Polymerization of SPMA

| Entry | $\tau$<br>(min) | $\nu_1$<br>(mL/min) | $\nu_M$<br>(mL/min) | $\nu_I$<br>(mL/min) | Con.<br>(%) | $M_{n,th}$<br>(g/mol) | $M_{n,GPC}$<br>(g/mol) | $M_w/M_n$ |
|-------|-----------------|---------------------|---------------------|---------------------|-------------|-----------------------|------------------------|-----------|
| 1     | 3.0             | 4.810               | 4.210               | 0.600               | 5.2         | 1300                  | 7900                   | 1.15      |
| 2     | 5.0             | 2.886               | 2.526               | 0.360               | 25.7        | 6300                  | 10500                  | 1.16      |
| 3     | 7.0             | 2.061               | 1.804               | 0.257               | 45.2        | 11100                 | 13100                  | 1.16      |
| 4     | 9.0             | 1.603               | 1.403               | 0.200               | 58.0        | 14300                 | 15900                  | 1.14      |
| 5     | 11.0            | 1.312               | 1.148               | 0.164               | 68.8        | 16900                 | 17800                  | 1.15      |
| 6     | 13.0            | 1.110               | 0.972               | 0.138               | 74.2        | 18300                 | 18500                  | 1.14      |
| 7     | 15.0            | 0.962               | 0.842               | 0.120               | 79.2        | 19500                 | 19000                  | 1.14      |
| 8     | 18.0            | 0.802               | 0.702               | 0.100               | 85.6        | 21100                 | 20400                  | 1.16      |
| 9     | 21.0            | 0.687               | 0.601               | 0.086               | 92.3        | 22700                 | 22100                  | 1.16      |
| 10    | 40.0            | 0.361               | 0.316               | 0.045               | >99         | 24400                 | 22700                  | 1.15      |

Polymerization conditions:  $[SPMA]_0/[CTBCOOH]_0/[AIBI]_0 = 100/1/0.2$ ,  $m(SPMA) = 7.28$  g,  $V_{water} = 24$  mL,  $L$  (tube length) = 6 m,  $V_t$  (tube volume) = 14.43 mL,  $\nu_1 = \nu_M + \nu_I$ ,  $\tau$  (retention time) =  $V_t/\nu_1$ , 15 temperature = 70 °C.

**Table S2** Polymerization of the 2<sup>nd</sup> block PEGMA

| Entry     | 1 <sup>st</sup> block PSPMA |                        |           | 2 <sup>nd</sup> block PPEGMA |                 |             |                       |                        |           |
|-----------|-----------------------------|------------------------|-----------|------------------------------|-----------------|-------------|-----------------------|------------------------|-----------|
|           | Con.<br>(%)                 | $M_{n,GPC}$<br>(g/mol) | $M_w/M_n$ | $L$<br>(m)                   | $\tau$<br>(min) | Con.<br>(%) | $M_{n,th}$<br>(g/mol) | $M_{n,GPC}$<br>(g/mol) | $M_w/M_n$ |
| <b>1a</b> | >99                         | 23900                  | 1.13      | 2                            | 5.8             | 3.2         | 23900                 | 23500                  | 1.14      |
| <b>2a</b> | >99                         | 22800                  | 1.18      | 3                            | 8.8             | 27.2        | 29600                 | 25400                  | 1.24      |
| <b>3a</b> | >99                         | 22900                  | 1.17      | 5                            | 14.6            | 59.5        | 37800                 | 27300                  | 1.25      |
| <b>4a</b> | >99                         | 23500                  | 1.16      | 7                            | 20.4            | 74.7        | 42400                 | 28100                  | 1.24      |
| <b>5a</b> | >99                         | 21300                  | 1.17      | 15                           | 43.8            | 96.9        | 45500                 | 29000                  | 1.26      |
| <b>1b</b> | >99                         | 22100                  | 1.16      | 3                            | 8.8             | 6.3         | 23700                 | 23000                  | 1.2       |
| <b>2b</b> | >99                         | 21600                  | 1.16      | 6                            | 17.5            | 24.4        | 26200                 | 24400                  | 1.18      |
| <b>3b</b> | >99                         | 22300                  | 1.15      | 13                           | 37.9            | 49.3        | 31000                 | 26000                  | 1.21      |
| <b>4b</b> | >99                         | 22800                  | 1.19      | 15                           | 43.8            | 62.2        | 33700                 | 27700                  | 1.21      |
| <b>5b</b> | >99                         | 21600                  | 1.16      | 21                           | 61.3            | 75.0        | 34700                 | 28400                  | 1.22      |

Polymerization conditions: 1<sup>st</sup> block PSPMA,  $[SPMA]_0/[CTBCOOH]_0/[AIBI]_0 = 100/1/0.2$ ,  $m$  (SPMA) = 7.28 g,  $V_{water} = 24$  mL,  $v_1 = 0.361$  mL/min, retention time = 40 min; 2<sup>nd</sup> block PPEGMA, entries 1a ~ 5a,  $[PEGMA]_0/[macro-CTA]_0/[AIBI]_0 = 50/1/0.1$ , entries 1b ~ 5b,  $[PEGMA]_0/[macro-5 CTA]_0/[AIBI]_0 = 50/1/0$ ,  $V_{PEGMA} = 7.05$  mL,  $v_2 = 0.463$  mL/min,  $v = v_1 + v_2 = 0.824$  mL/min,  $\tau$  (retention time) =  $V_t$  (tube volume)/ $v$ ,  $L$  represents lengths of the tube and the tube inner diameter (ID) = 1.75 mm, temperature = 70 °C.

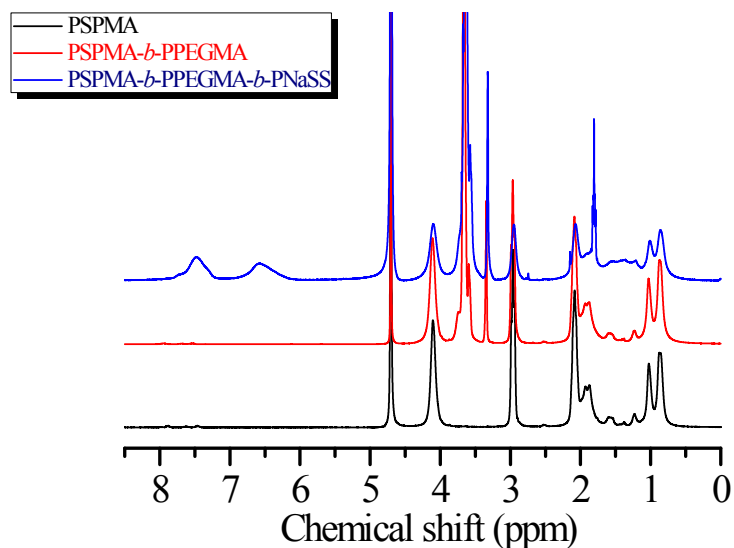

**Fig. S1.** <sup>1</sup>H NMR spectrum (300MHz, D<sub>2</sub>O) of PSPMA, PSPMA-*b*-PPEGMA obtained in a continuous tubular reactor and PSPMA-*b*-PPEGMA-*b*-PNaSS triblock copolymer after chain extension in ampoules. Chain extension polymerization conditions: [NaSS]<sub>0</sub>/[PSPMA<sub>101</sub>-*b*-5 PPEGMA<sub>24</sub>]<sub>0</sub>/[AIBI]<sub>0</sub> = 1000/1/0.2, m (NaSS) = 0.31 g, V<sub>water</sub> = 3.5 mL, t = 50 min, temperature = 70 °C.
